# Supplementary material
Source: PubMed Central journal article supplement (PMC3555144)

a

# Undifferentiated mESCs

## XY

## XX

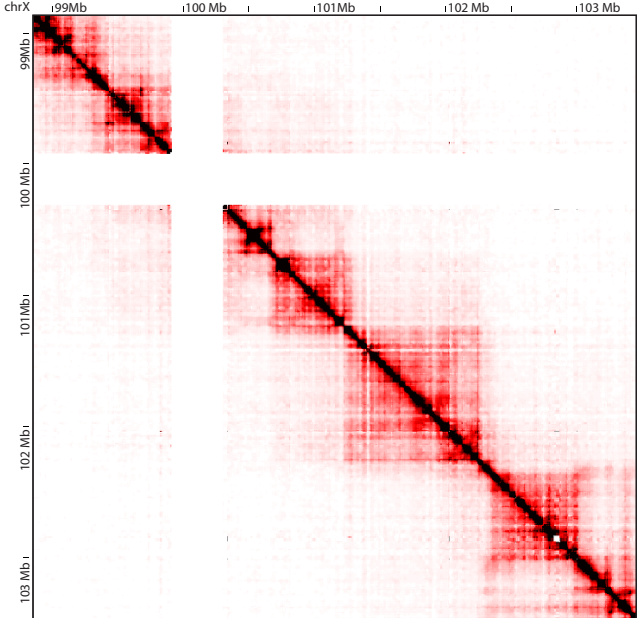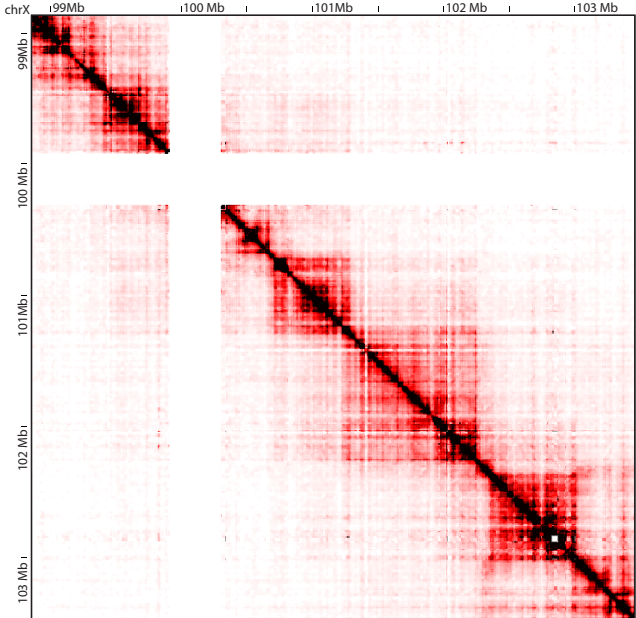

1Mb

median count in 30kb window  
2 98% of max



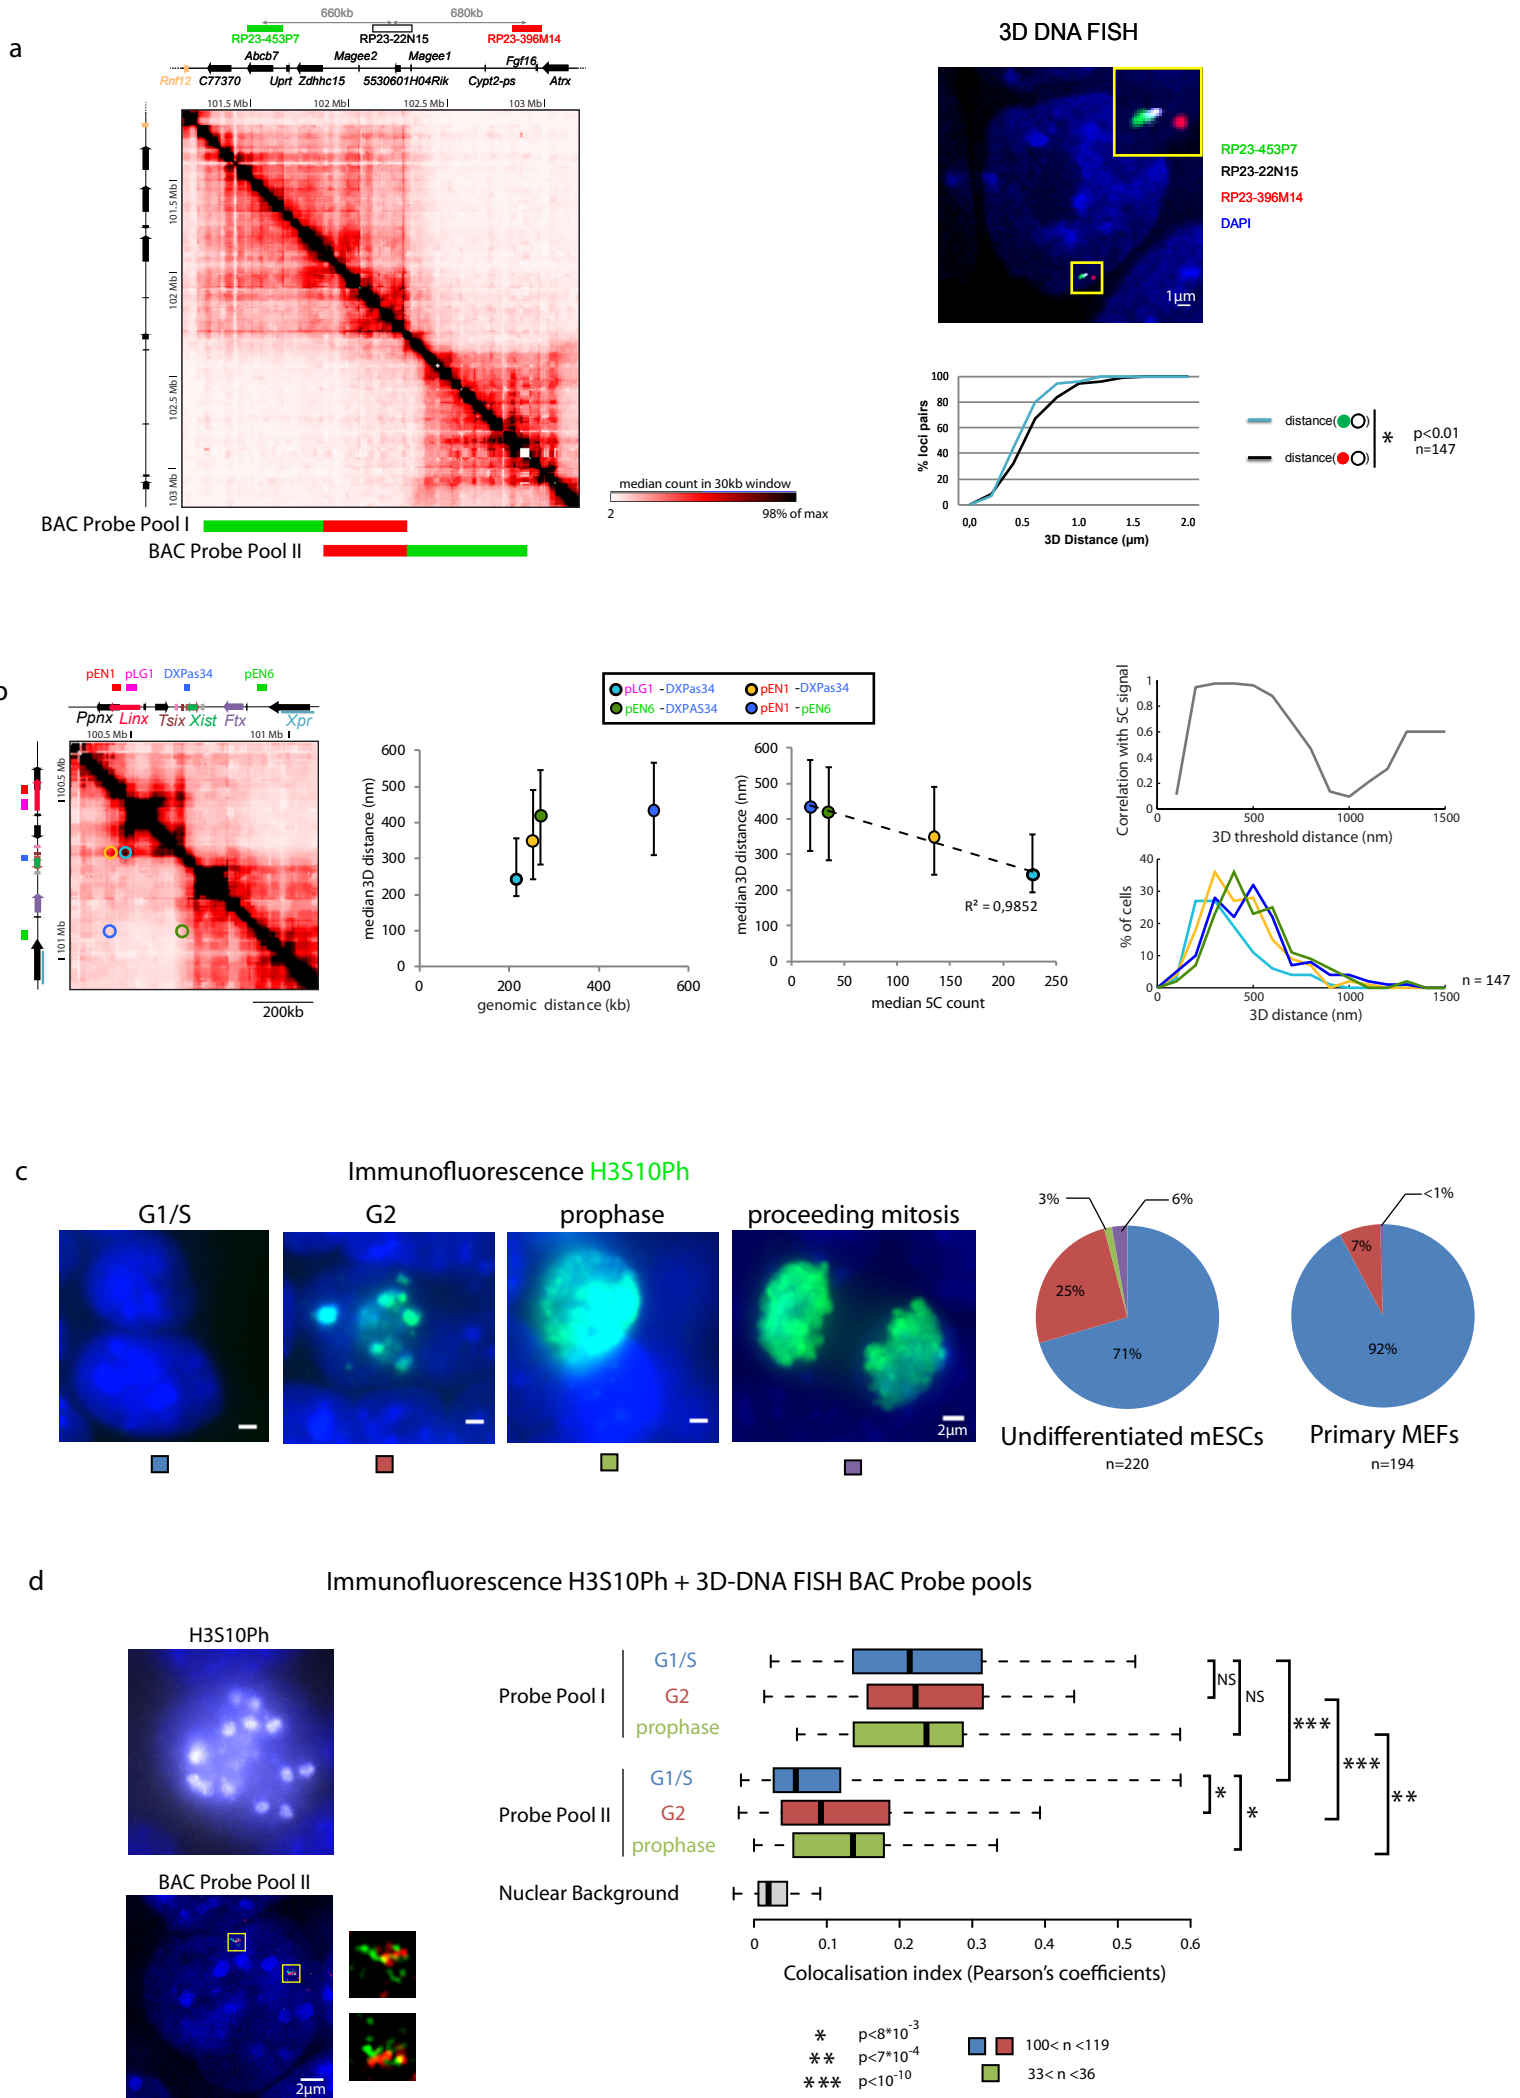



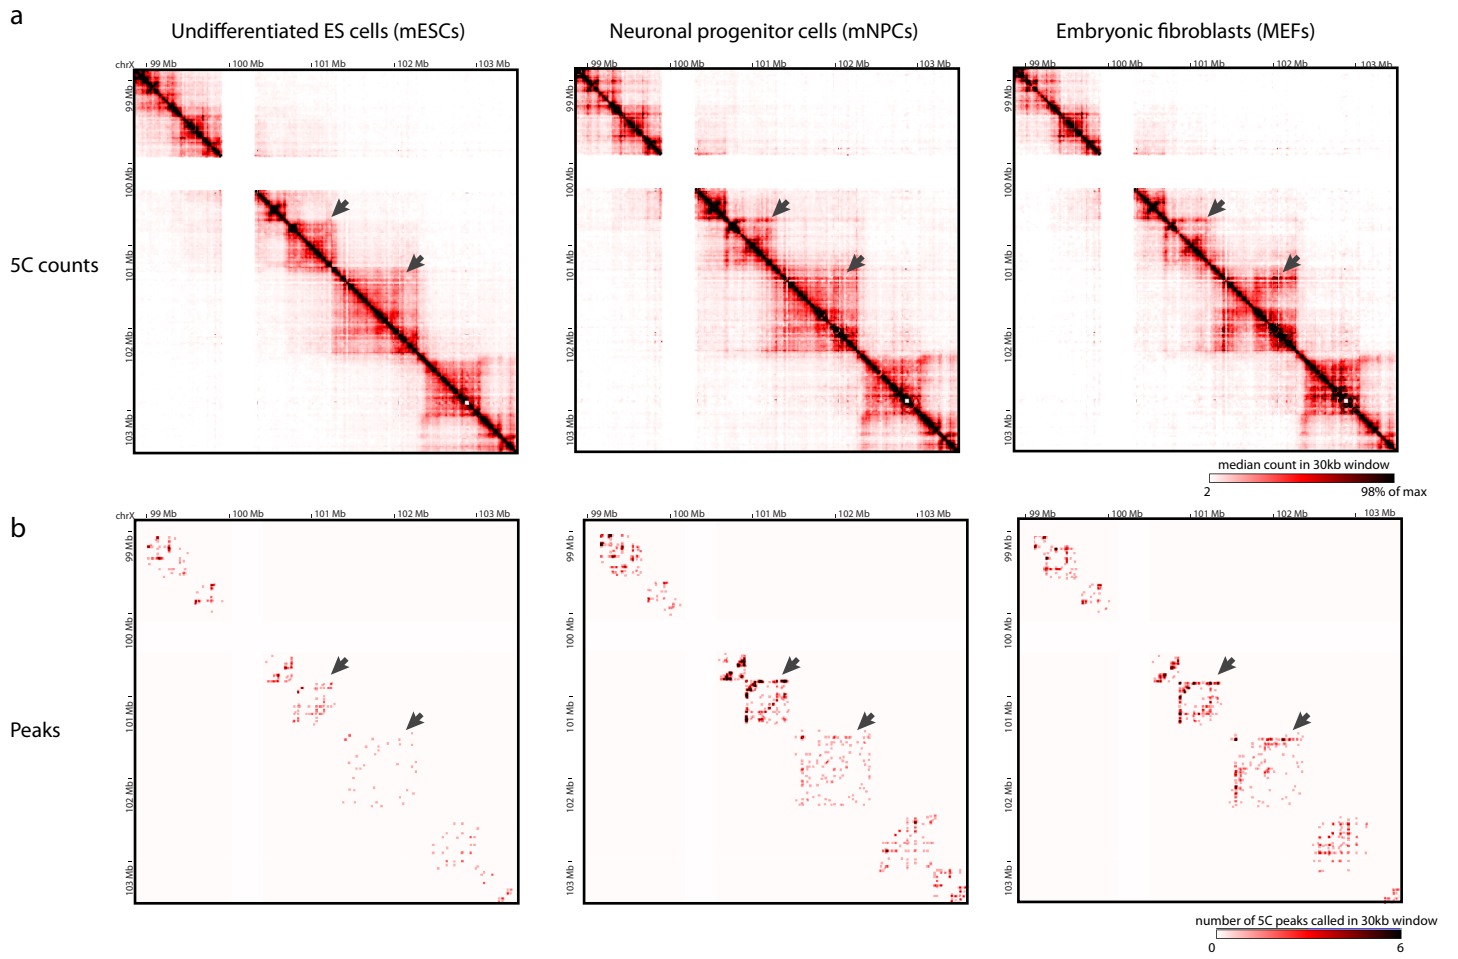

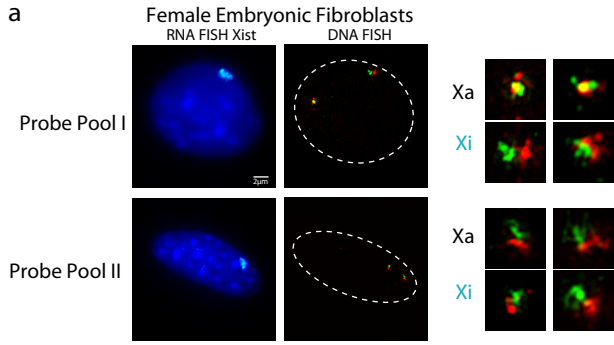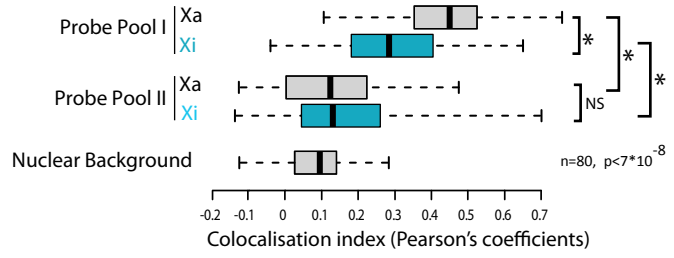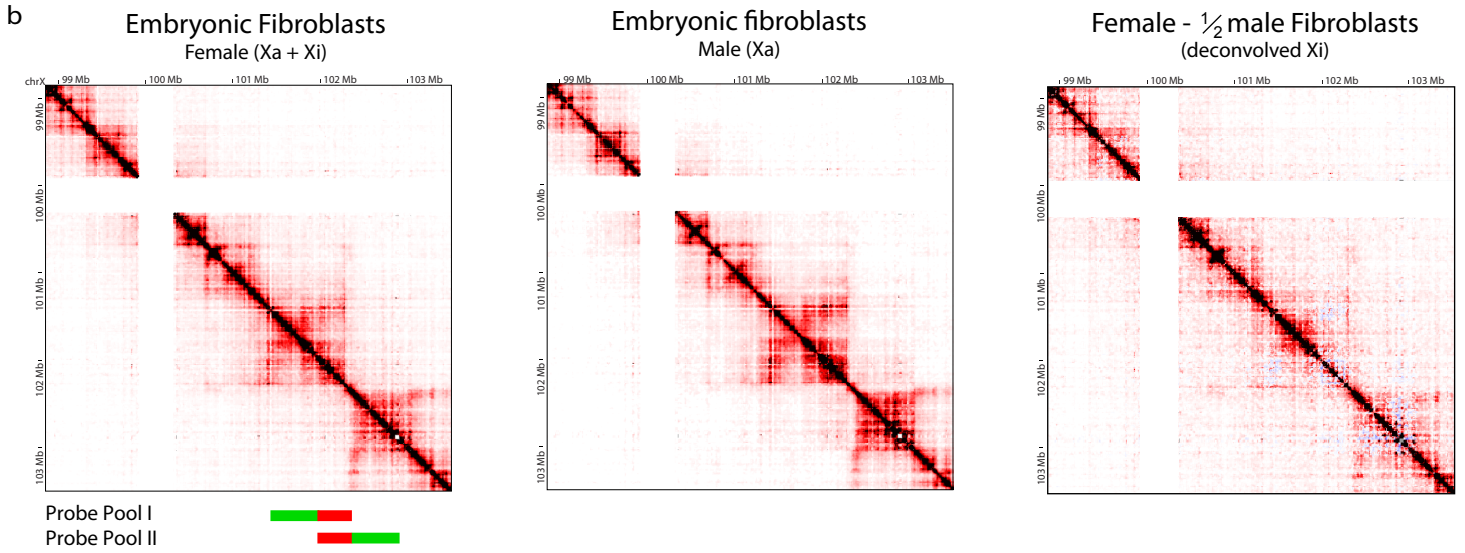

**c**

$$\begin{bmatrix} \text{Female} \\ 50\% \text{ reads from Xa} \\ 50\% \text{ reads from Xi} \end{bmatrix} - \frac{1}{2} \begin{bmatrix} \text{Male} \\ 100\% \text{ reads from Xa} \end{bmatrix} = \begin{bmatrix} \text{deconvolved Xi} \\ 50\% \text{ reads from Xi} \end{bmatrix}$$

$$\begin{bmatrix} \text{Female replicate 1} \\ 50\% \text{ reads from Xa} \\ 50\% \text{ reads from Xi} \end{bmatrix} - \frac{1}{2} \begin{bmatrix} \text{Female replicate 2} \\ 50\% \text{ reads from Xa} \\ 50\% \text{ reads from Xi} \end{bmatrix} = \begin{bmatrix} \text{mock deconvolution} \\ 25\% \text{ reads from Xa} \\ 25\% \text{ reads from Xi} \end{bmatrix}$$

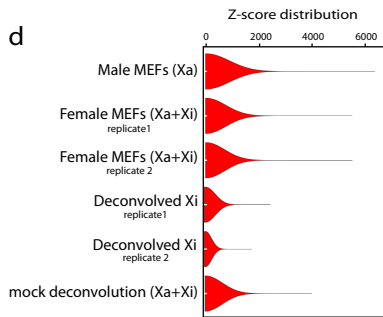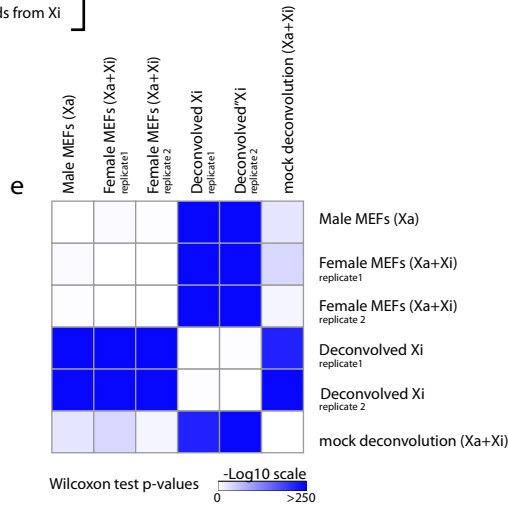

**f** Female replicate 1 - 1/2 Female replicate 2 (mock deconvolution: Xa+Xi)

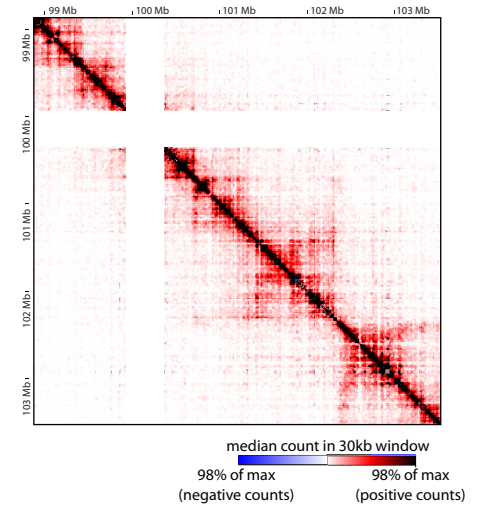

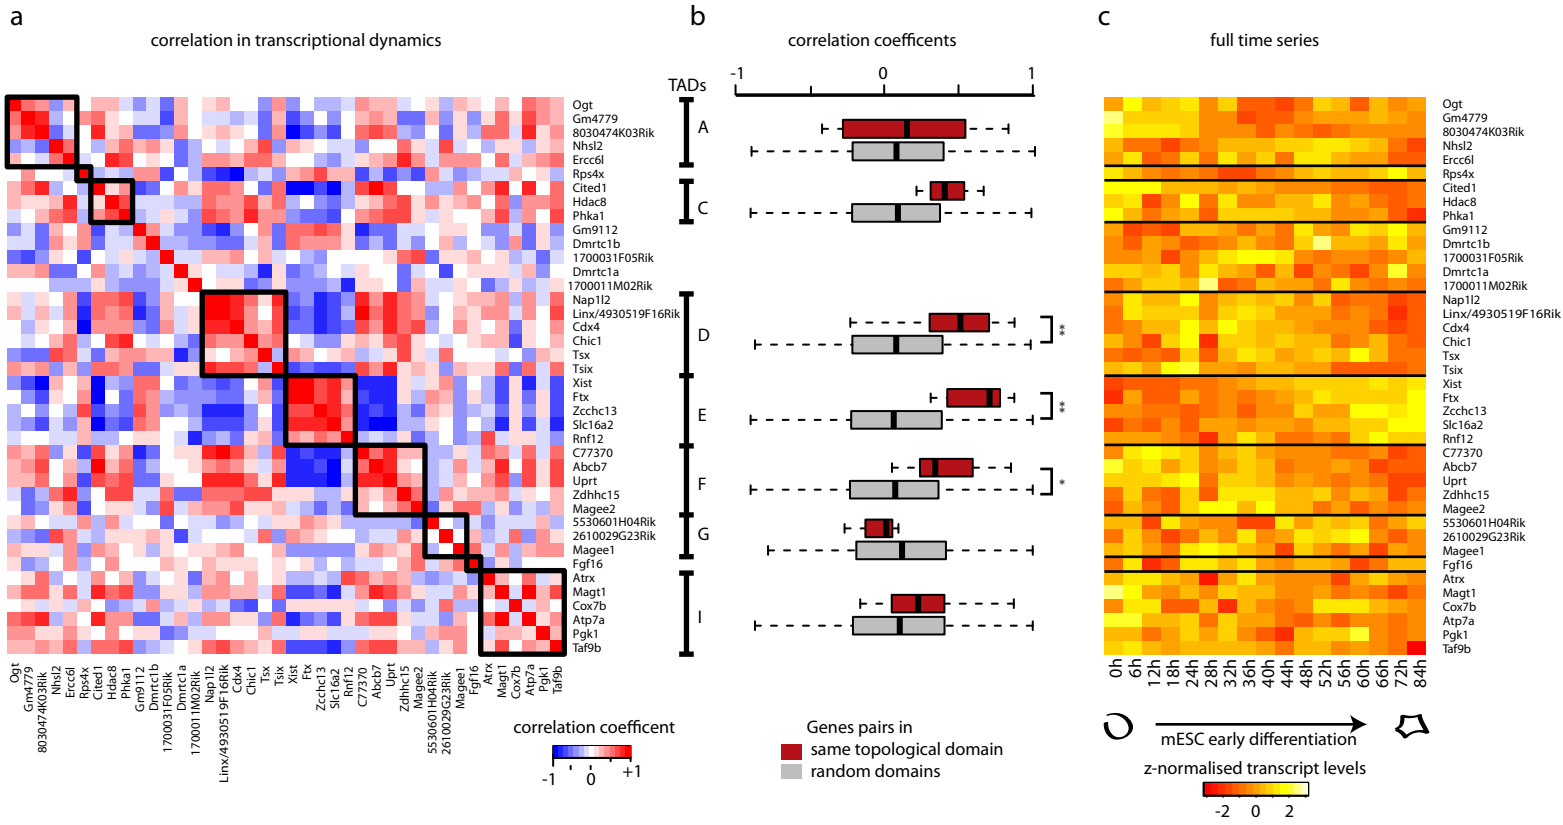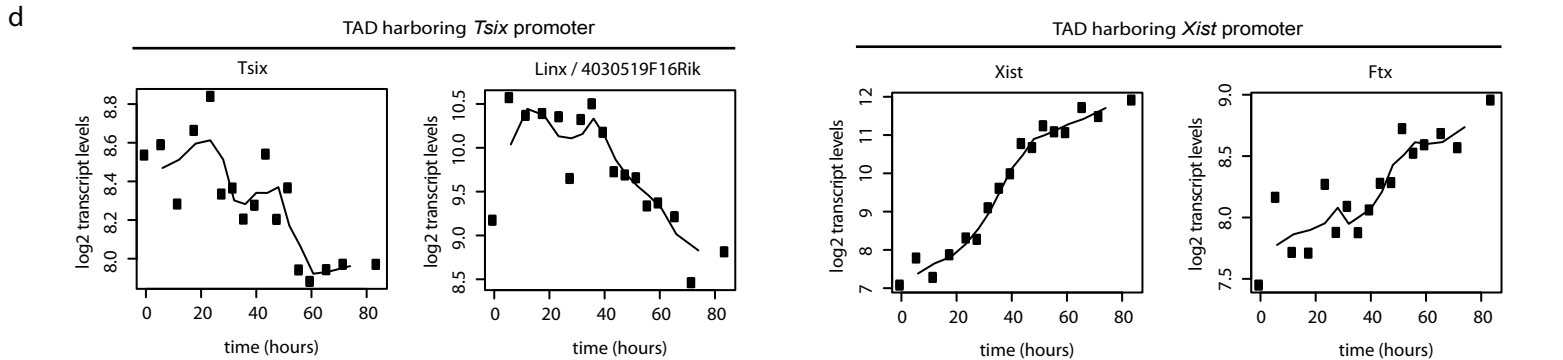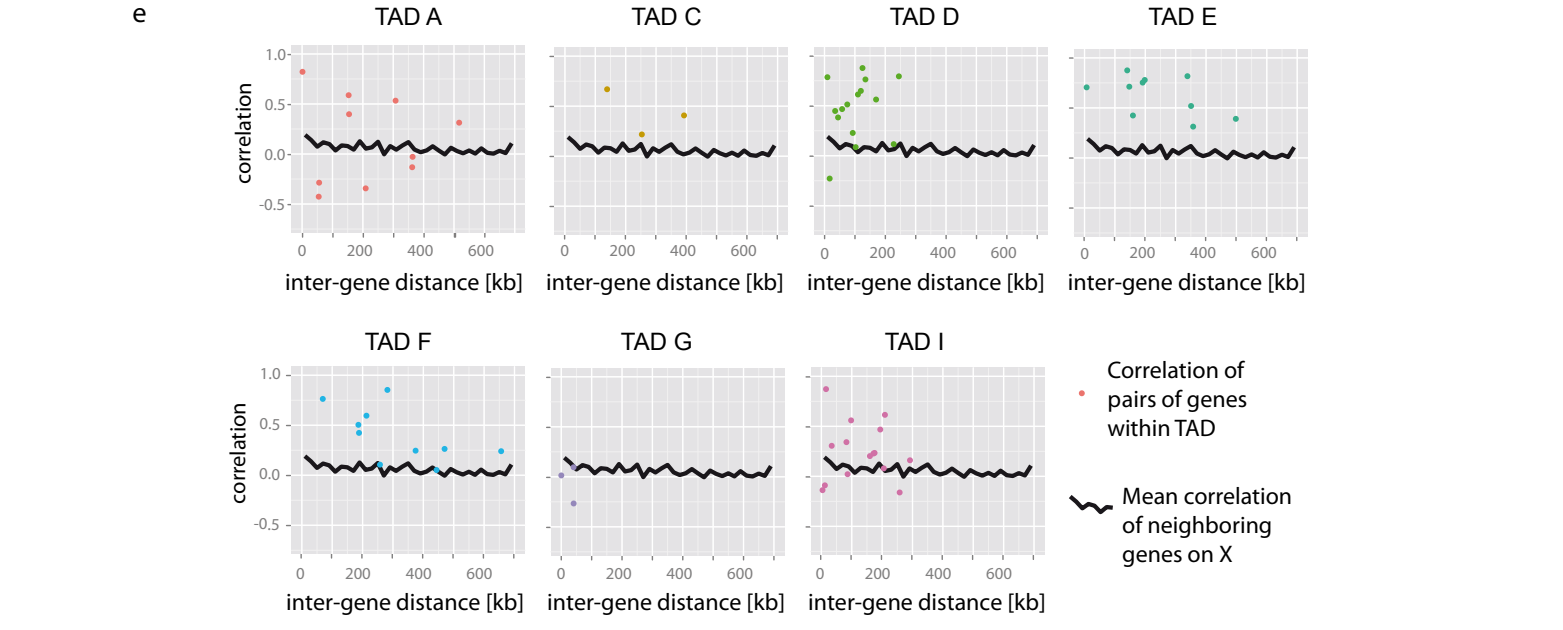

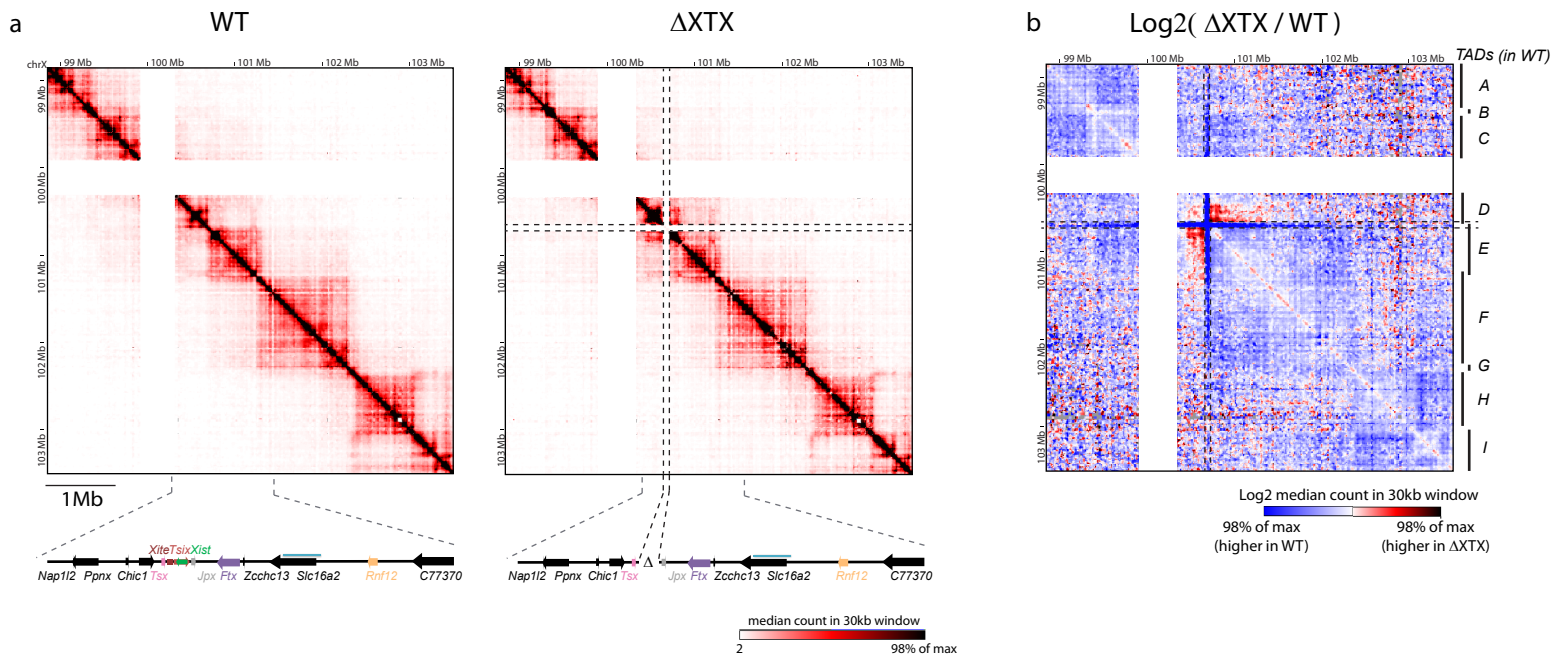



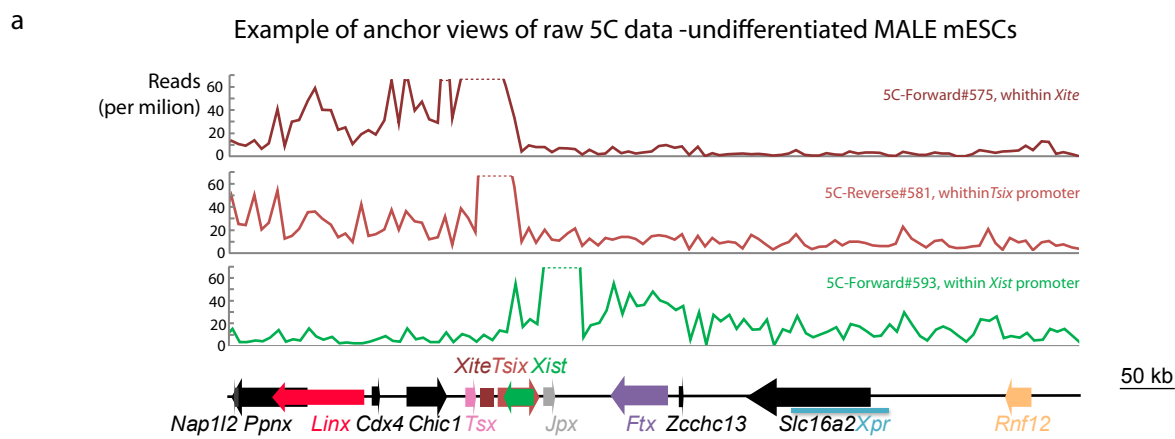

**b** Peak calling for all 5C fragments within *Xite*, *Tsix* promoter and *Xist* promoter

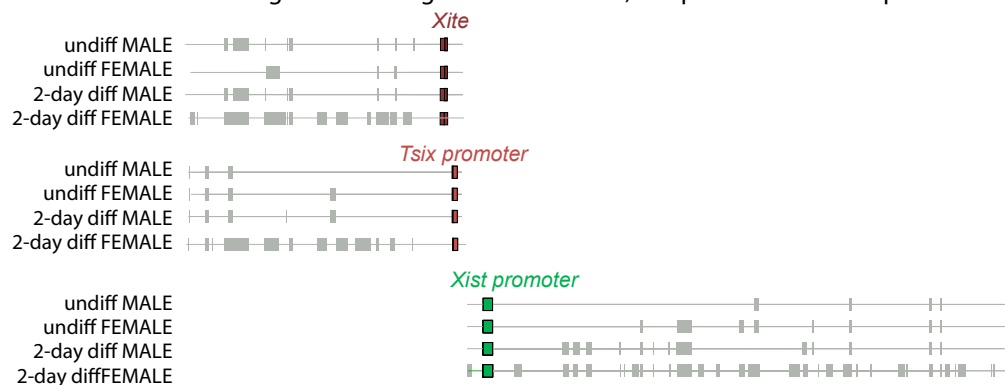

**c** Detailed anchor views of 5C-Reverse #576 (within *Xite*) across TAD#D

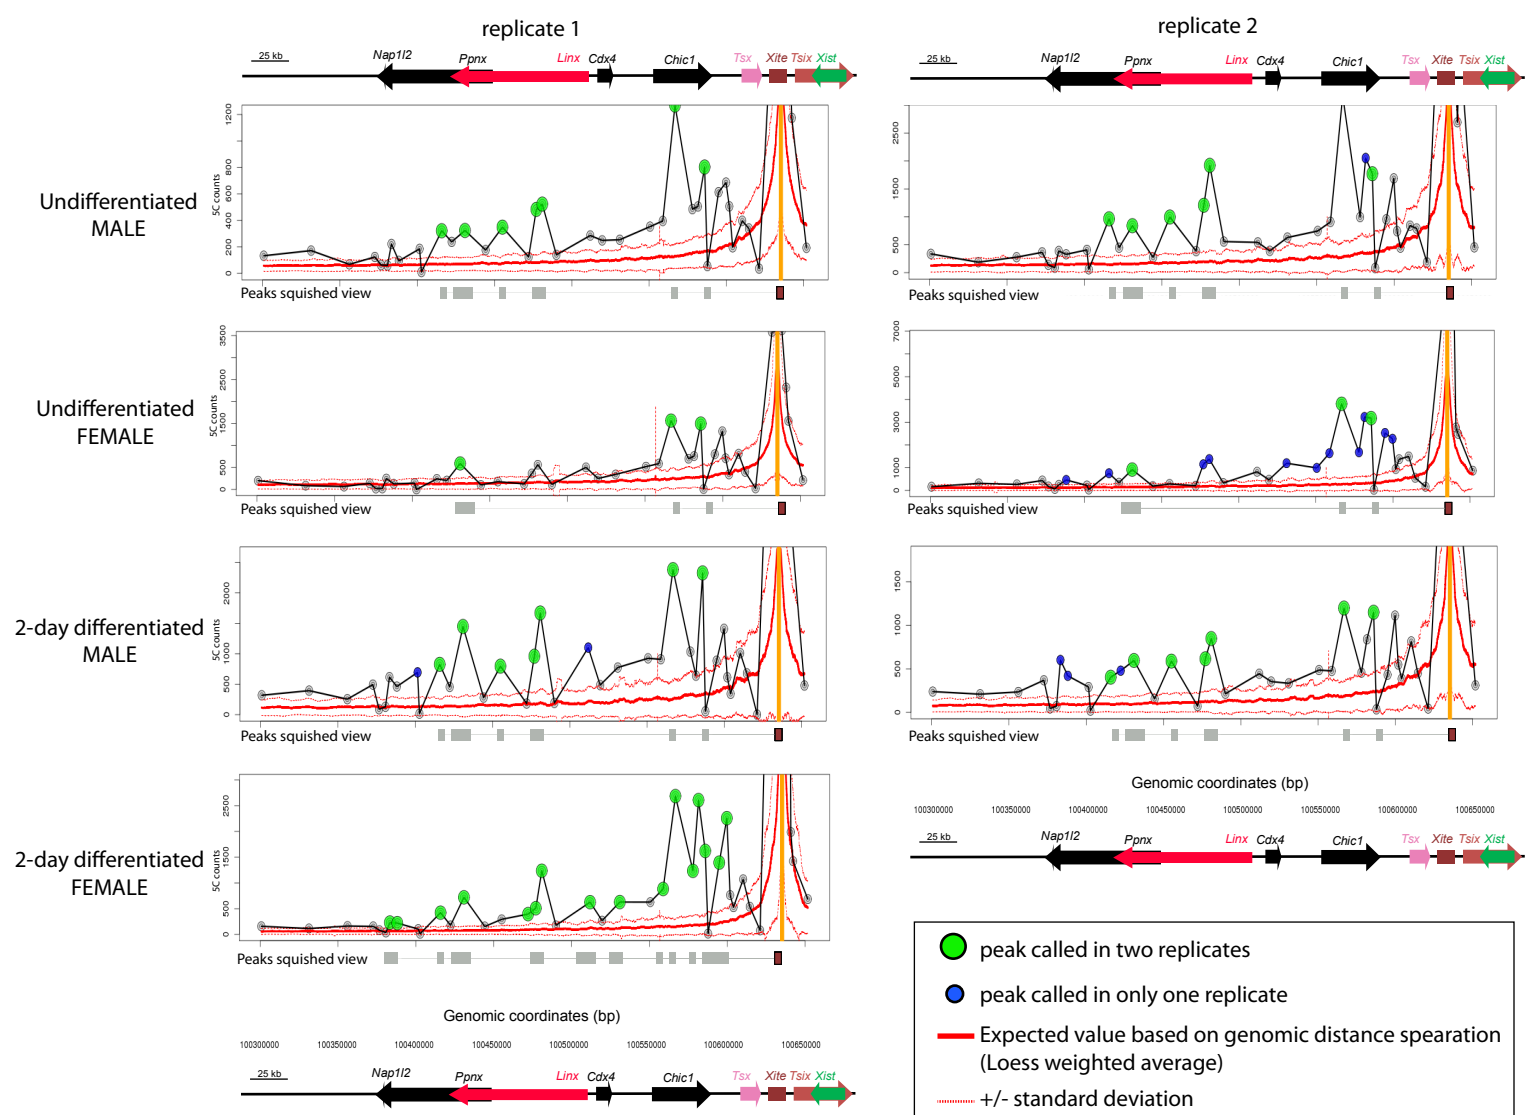

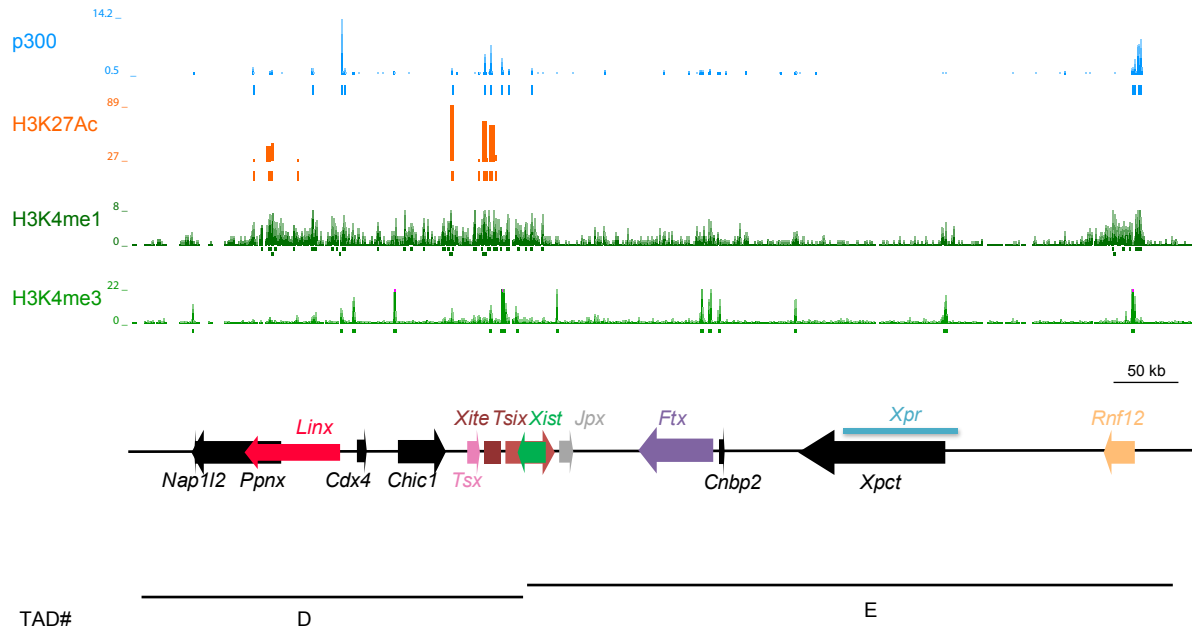

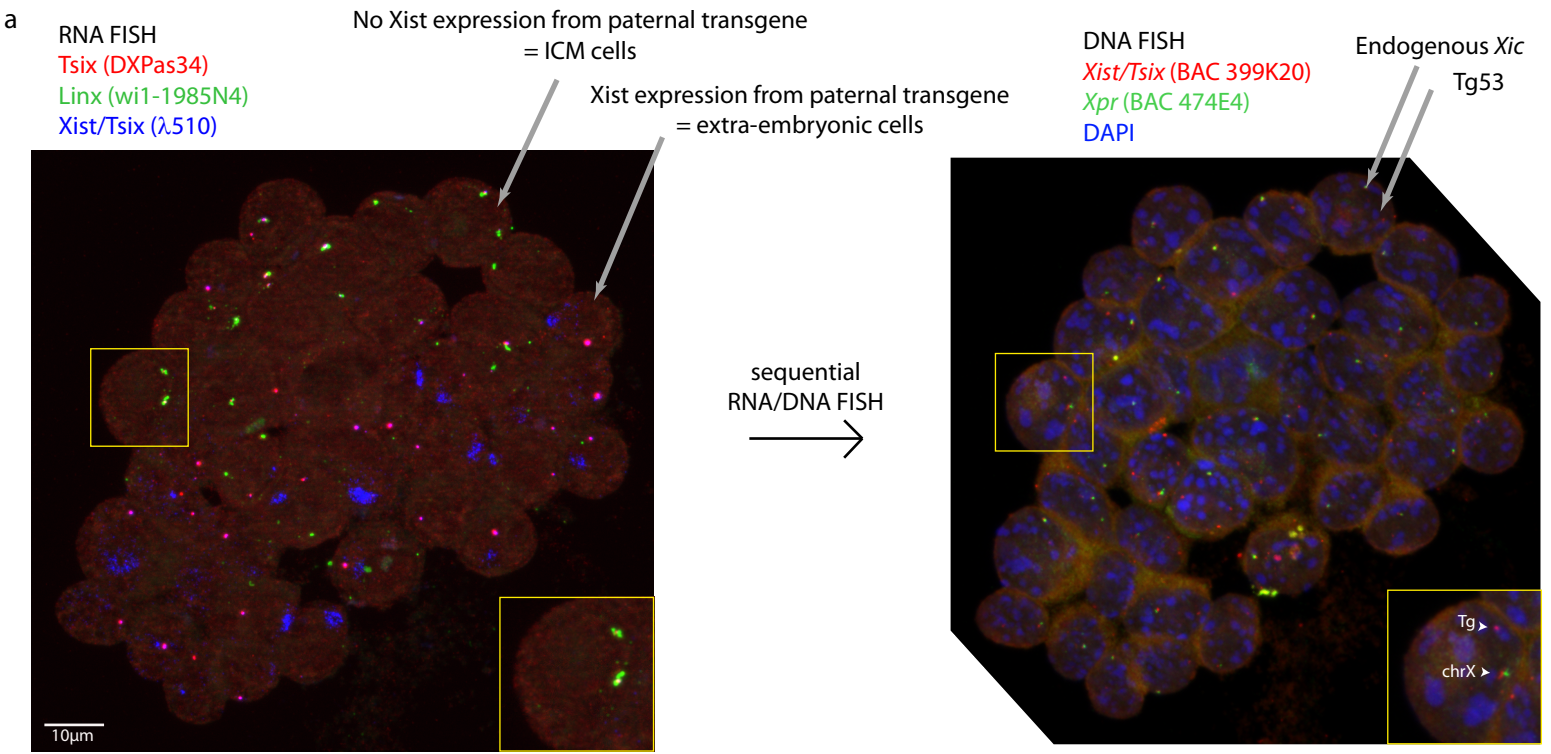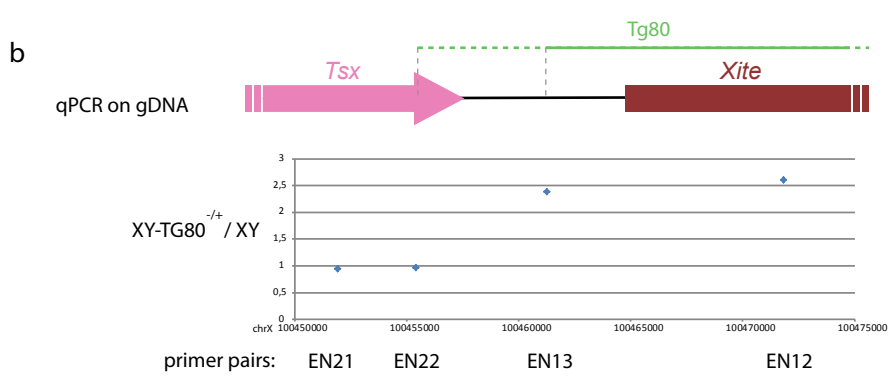

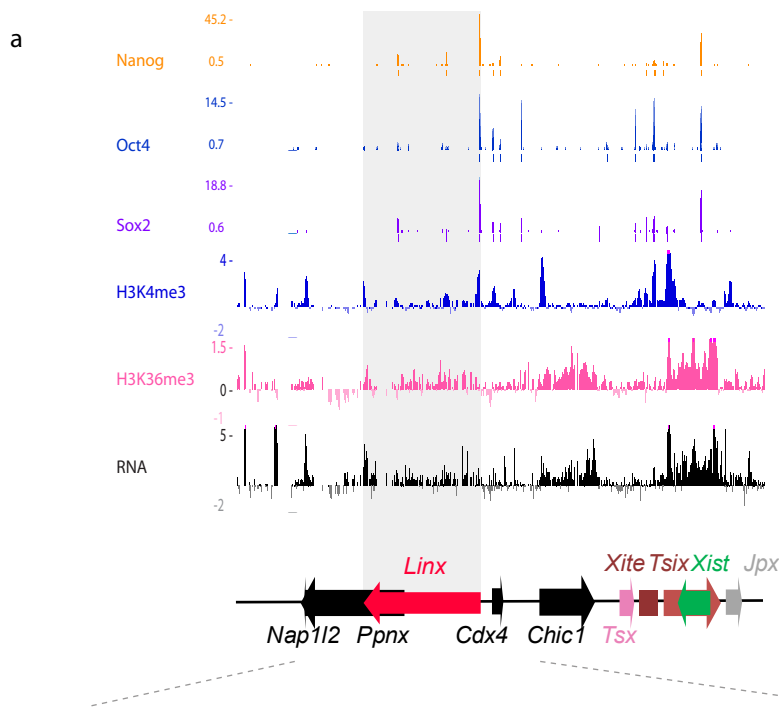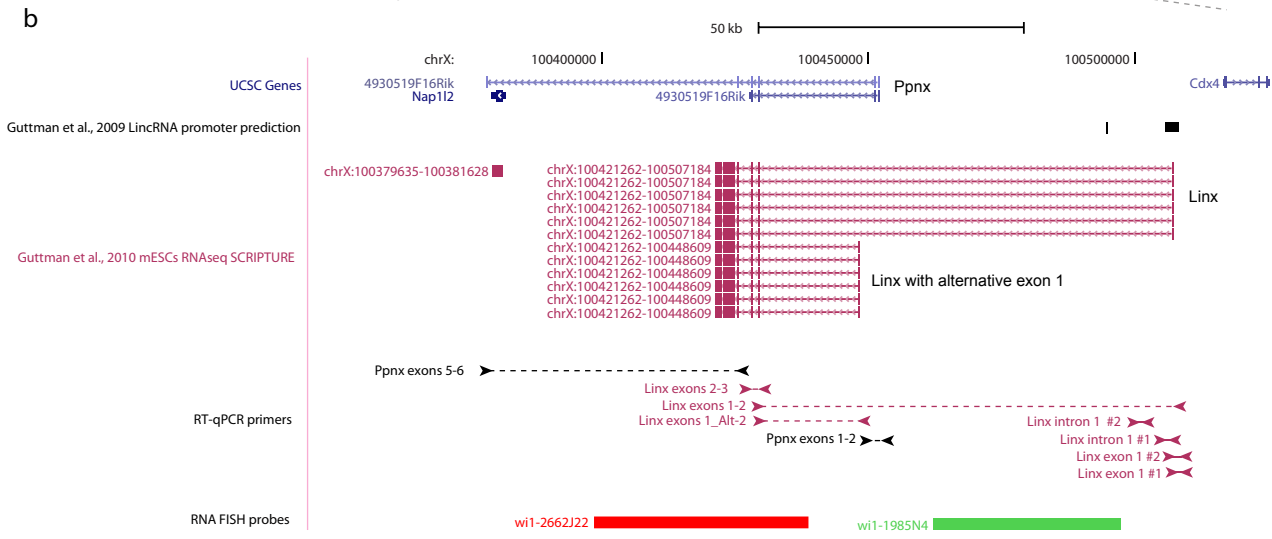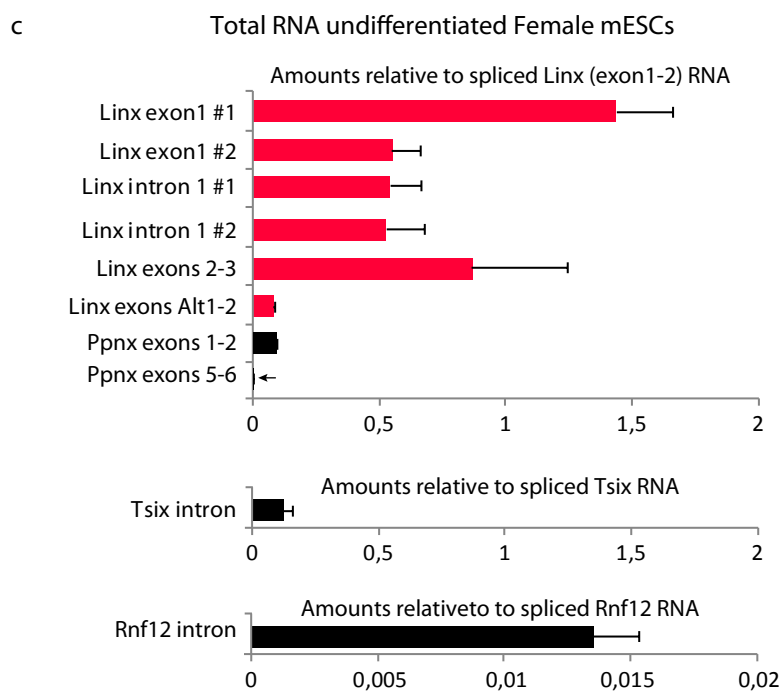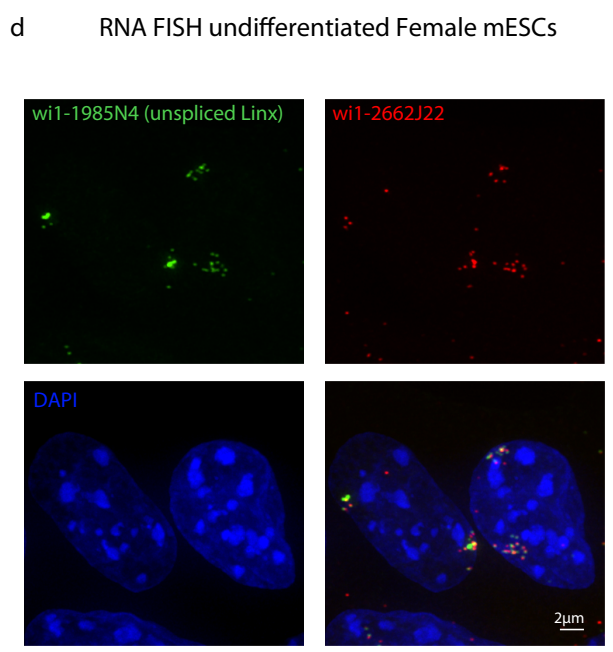

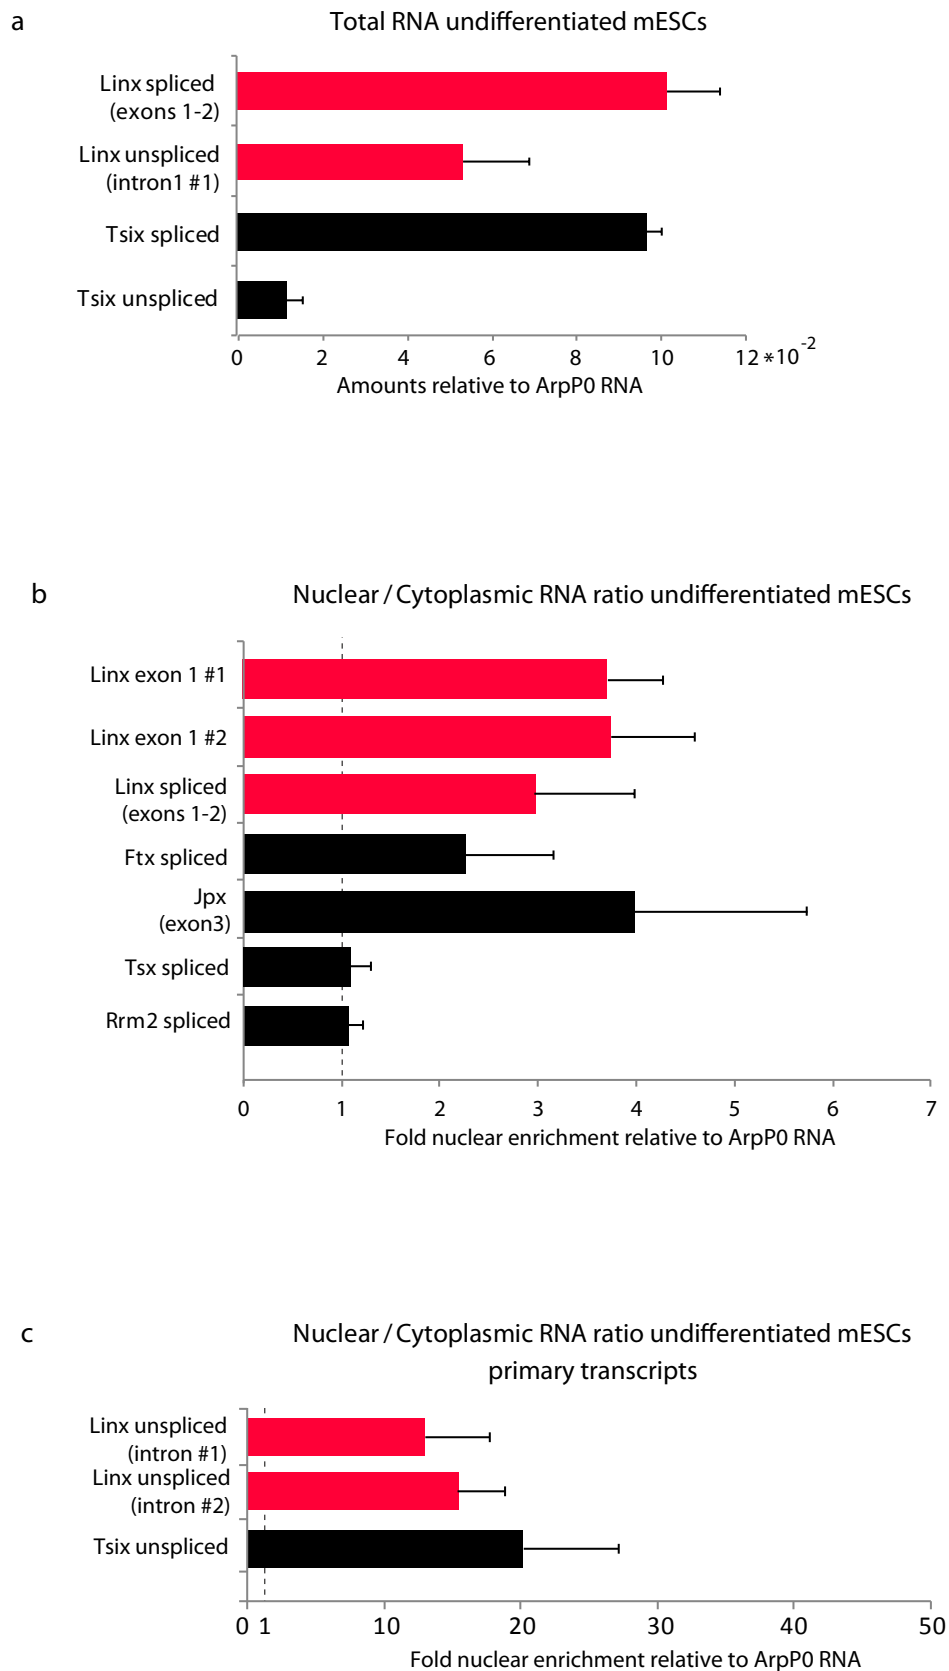

a

RNA FISH on differentiating female mESCs

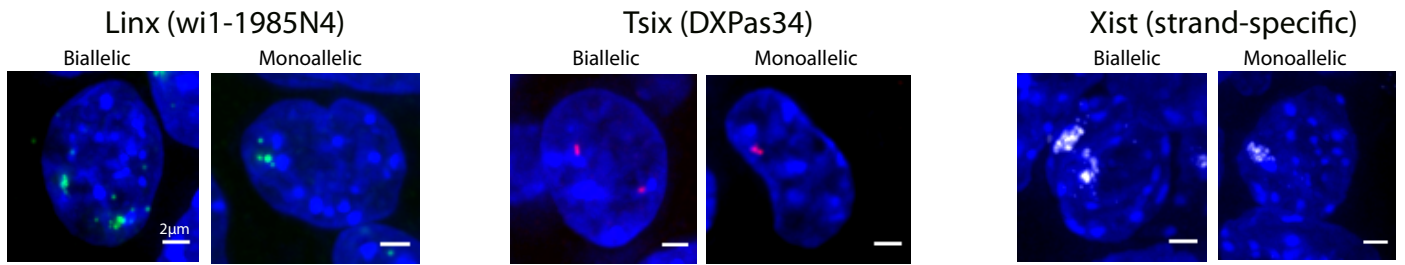

b

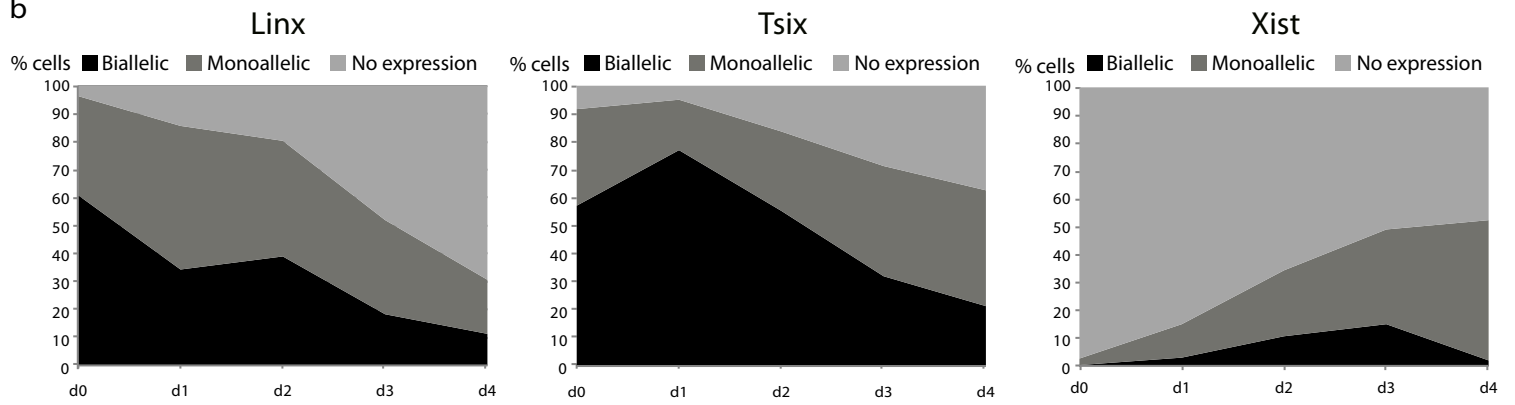

c

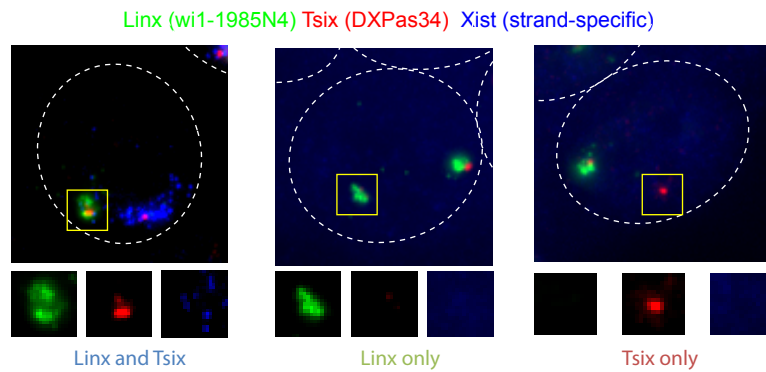

d

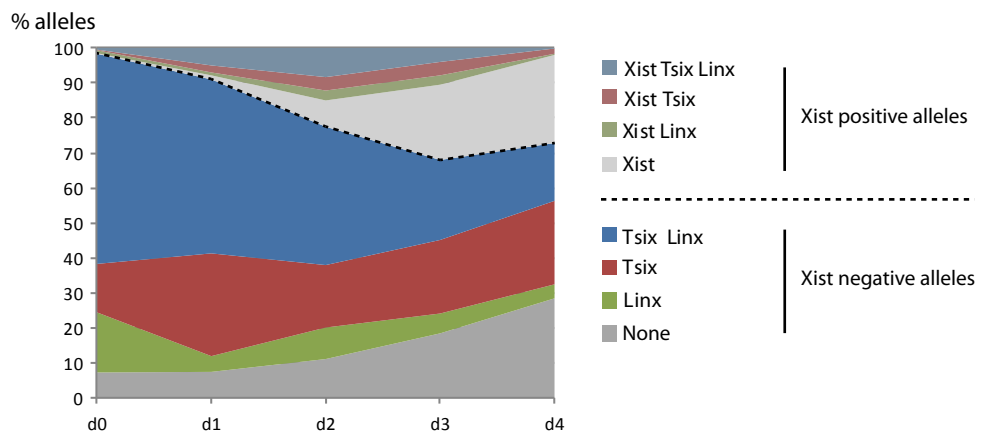

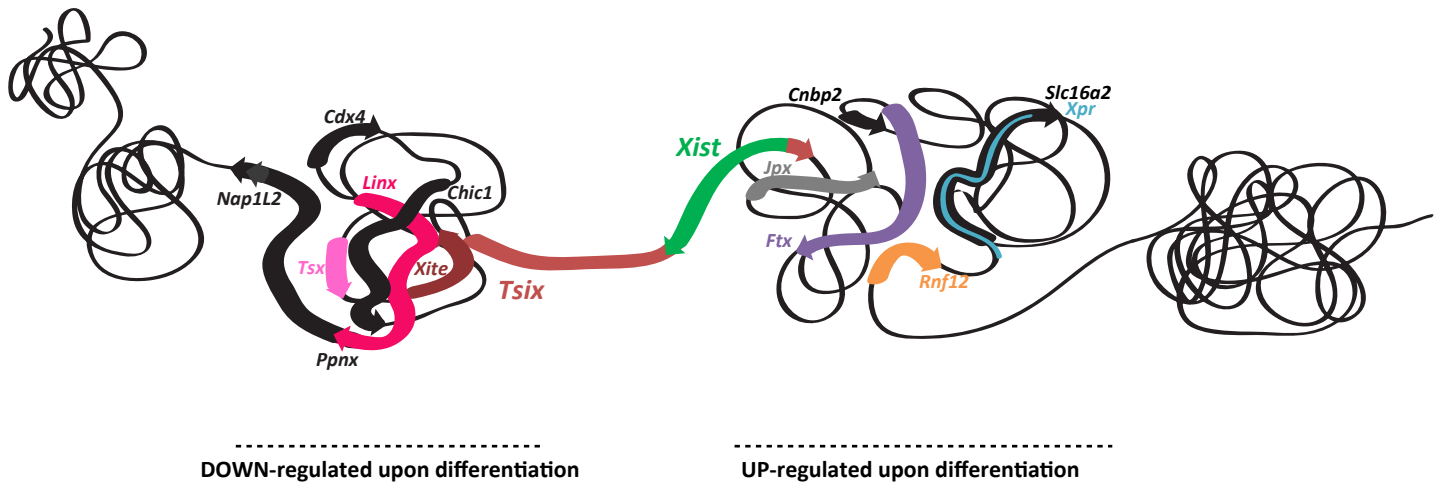

Supplement: NIHMS433490-supplement-supplemental_figures.pdf [file NIHMS433490-supplement-supplemental_figures.pdf]
